# Supplementary material
Source: PubMed Central journal article supplement (PMC5687063)
Supplement: NIHMS871630-supplement-supplement_1.pdf [file NIHMS871630-supplement-supplement_1.pdf]

|  |                          |    |    |    |    |     |    |    |    |    |    |    |    |    |    |    |    |    |
|--|--------------------------|----|----|----|----|-----|----|----|----|----|----|----|----|----|----|----|----|----|
|  |                          |    | 0. |    |    | <.0 |    |    | 0. |    |    | 0. |    |    | 0. |    |    |    |
|  |                          | 0. | 0. | 0  | 0. | 0.  | 0  | 0. | 0. | 0  | 0. | 0. | 0  | 0. | 0. | 0  | 0. | 0. |
|  |                          | 08 | 02 | 0  | 11 | 03  | 0  | 10 | 04 | 0  | 13 | 04 | 0  | 13 | 03 | 0  | 04 | 03 |
|  | Monocytes (x10E3/uL)*    |    |    | 1  |    |     | 1  |    |    | 6  |    | 1  |    |    | 1  |    |    |    |
|  | Eosinophils (x10E3/uL)*§ | 0. | 0. | 0. | 0. | 0.  | 0. | 0. | 0. | 0. | 0. | 0. | 0. | 0. | 0. | 0. | 0. |    |
|  |                          | 06 | 04 | 1  | 10 | 05  | 3  | 10 | 07 | 1  | 10 | 07 | 1  | 10 | 06 | 8  | 04 | 04 |
|  |                          |    |    | 3  |    |     | 3  |    |    | 2  |    | 4  |    |    | 8  |    |    |    |

All models adjusted for sex (male,female), age in years (<35,35-50,>50), race (White,Black,Other), Body Mass Index (<24.9,25.0-29.9,>30), alcohol consumption (not current drinker,fewer than 7 drinks per week,more than 7 drinks per week), education (Less than high school or equivalent,High school diploma or GED,Some college or 2 year degree,4 year college graduate), and household annual income (<\$20000,\$20001-\$50000,>\$50000).

\*In-transformed.

\*\*Tobacco smoke-unexposed participants reported no primary tobacco use, less than 30 minutes of passive smoke exposure, and had blood 2,5-DMF concentrations less than 14 ng/L.

\*\*\*Tobacco smoke-exposed participants either reported primary tobacco use, 30 or more minutes of passive smoke exposure, or had blood 2,5-DMF concentrations greater than or equal to 14 ng/L.

§Participants with eosinophil percentage equal to zero were assigned a value of 0.5% to permit ln-transform.

## Highlights

- Among tobacco smoke-unexposed participants, we observed inverse associations between blood benzene concentrations and hemoglobin concentration and mean corpuscular hemoglobin concentration, and a positive association with red cell distribution width.
- Among tobacco smoke-exposed participants, we observed positive associations between blood VOC concentrations and several hematologic parameters, including increased white blood cell and platelet counts, suggestive of hematopoietic stimulation typically associated with tobacco smoke exposure.
- Most associations with were stronger for benzene than for the other VOCs.

Supplemental Table S1. Associations between blood BTEXS concentrations and hematologic parameters by three-level quantiles.

|    | Benzene |       |    | Toluene |       |    | Ethylbenzene |       |    | o-Xylene |       |    | m/p-Xylene |       |    | Styrene |       |    |
|----|---------|-------|----|---------|-------|----|--------------|-------|----|----------|-------|----|------------|-------|----|---------|-------|----|
| 1  |         |       |    | 1       |       |    | 1            |       |    | 1        |       |    | 1          |       |    | 1       |       |    |
| s  |         |       |    | s       |       |    | s            |       |    | s        |       |    | s          |       |    | s       |       |    |
| t  |         |       |    | t       |       |    | t            |       |    | t        |       |    | t          |       |    | t       |       |    |
| Q  | 2nd     | 3rd   | Q  | 2nd     | 3rd   | Q  | 2nd          | 3rd   | Q  | 2nd      | 3rd   | Q  | 2nd        | 3rd   | Q  | 2nd     | 3rd   | Q  |
| u  | Qu      | Qu    | u  | Qu      | Qu    | u  | Qu           | Qu    | u  | Qu       | Qu    | u  | Qu         | Qu    | u  | Qu      | Qu    | u  |
| a  | antil   | antil | a  | antil   | antil | a  | antil        | antil | a  | antil    | antil | a  | antil      | antil | a  | antil   | antil | a  |
| n  | e       | e     | n  | e       | e     | n  | e            | e     | n  | e        | e     | n  | e          | e     | n  | e       | e     | n  |
| ti |         |       | ti |         |       | ti |              |       | ti |          |       | ti |            |       | ti |         |       | ti |
| l  |         |       | l  |         |       | l  |              |       | l  |          |       | l  |            |       | l  |         |       | l  |
| e  |         |       | e  |         |       | e  |              |       | e  |          |       | e  |            |       | e  |         |       | e  |
| (  |         |       | (  |         |       | (  |              |       | (  |          |       | (  |            |       | (  |         |       | (  |
| n  | (n=     | (n=   | n  | (n=     | (n=   | n  | (n=          | (n=   | n  | (n=      | (n=   | n  | (n=        | (n=   | n  | (n=     | (n=   | n  |
| =  | 25)     | 24)   | =  | 47)     | 48)   | =  | 20)          | 21)   | =  | 27)      | 28)   | =  | 48)        | 49)   | =  | 41)     | 42)   | =  |
| 9  |         |       | 4  |         |       | 6  |              |       | 8  |          |       | 4  |            |       | 5  |         |       | 8  |
| 3  |         |       | 9  |         |       | 4  |              |       | 7  |          |       | 9  |            |       | 8  |         |       | 8  |

|                |        | )     |            |               |           | ) |   |   |   | ) |   |   |   | ) |   |   |   |   |   |   |     |
|----------------|--------|-------|------------|---------------|-----------|---|---|---|---|---|---|---|---|---|---|---|---|---|---|---|-----|
|                |        | E     | S          | E             | S         | E | S | E | S | E | S | E | S | E | S | E | S | E | S | E | S   |
|                |        | f     | t          | f             | t         | f | t | f | t | f | t | f | t | f | t | f | t | f | t | f | t   |
|                |        | a     | a          | a             | a         | a | a | a | a | a | a | a | a | a | a | a | a | a | a | a | a   |
|                |        | c     | c          | c             | c         | c | c | c | c | c | c | c | c | c | c | c | c | c | c | c | c   |
|                |        | t     | t          | t             | t         | t | t | t | t | t | t | t | t | t | t | t | t | t | t | t | t   |
|                |        | E     | r          | E             | r         | E | r | E | r | E | r | E | r | E | r | E | r | E | r | E | r   |
|                |        | s     | d          | s             | d         | s | d | s | d | s | d | s | d | s | d | s | d | s | d | s | d   |
|                |        | i     | E          | i             | E         | i | E | i | E | i | E | i | E | i | E | i | E | i | E | i | E   |
| Po             | pul    | a     | t          | o             | t         | a | t | o | t | a | t | o | t | a | t | o | t | a | t | o | t   |
|                |        |       |            |               |           |   |   |   |   |   |   |   |   |   |   |   |   |   |   |   |     |
|                |        | m     | r          | m             | r         | m | r | m | r | m | r | m | r | m | r | m | r | m | r | m | r   |
|                |        | a     | r          | a             | r         | a | r | a | r | a | r | a | r | a | r | a | r | a | r | a | r   |
|                |        | t     | t          | t             | t         | t | t | t | t | t | t | t | t | t | t | t | t | t | t | t | t   |
|                |        | e     | r          | e             | r         | e | r | e | r | e | r | e | r | e | r | e | r | e | r | e | r   |
|                |        | -     | 0          | -             | 0         | 0 | 0 | - | 0 | 0 | 0 | - | 0 | - | 0 | - | 0 | 0 | 0 | - | 0   |
| RBC            | (x10   | E6/u  | L)         | R             | E         | F | F | F | F | R | E | F | F | R | E | F | F | R | E | F | F   |
|                |        |       |            |               |           |   |   |   |   |   |   |   |   |   |   |   |   |   |   |   |     |
|                |        | 1     | 0          | 0             | 1         | 0 | 0 | 0 | 0 | 2 | 1 | 1 | 1 | 0 | 1 | 1 | 0 | 1 | 0 | 1 | 0   |
|                |        | 3     | 9          | 2             | 0         | 7 | 9 | 4 | 9 | 2 | 1 | 0 | 2 | 8 | 0 | 8 | 9 | 0 | 9 | 0 | 8   |
|                |        | 0     | 0          | 0             | 0         | 0 | 0 | 0 | 0 | 0 | 0 | 0 | 0 | 0 | 0 | 0 | 0 | 0 | 0 | 0 | 0   |
| Hemoglobin     | (g/dL) | R     | E          | F             | F         | R | E | F | F | R | E | F | F | R | E | F | F | R | E | F | F   |
|                |        |       |            |               |           |   |   |   |   |   |   |   |   |   |   |   |   |   |   |   |     |
|                |        | 2     | 2          | 4             | 5         | 3 | 2 | 0 | 2 | 4 | 2 | 3 | 3 | 2 | 2 | 4 | 4 | 3 | 2 | 3 | 2   |
|                |        | 3     | 4          | 5             | 5         | 1 | 4 | 3 | 2 | 6 | 9 | 3 | 1 | 7 | 5 | 7 | 4 | 5 | 2 | 2 | 2   |
|                |        | 0     | 0          | 0             | 0         | 0 | 0 | 0 | 0 | 1 | 0 | 0 | 0 | 0 | 0 | 1 | 0 | 0 | 0 | 1 | 0   |
| Hematocrit (%) | R      | E     | F          | F             | R         | E | F | F | R | E | F | F | R | E | F | F | R | E | F | F |     |
|                |        |       |            |               |           |   |   |   |   |   |   |   |   |   |   |   |   |   |   |   | REF |
|                |        | 5     | 7          | 6             | 9         | 1 | 6 | 6 | 4 | 9 | 8 | 8 | 8 | 7 | 7 | 8 | 8 | 6 | 6 | 3 | 0   |
|                |        | 9     | 0          | 9             | 5         | 4 | 8 | 3 | 4 | 7 | 2 | 1 | 8 | 4 | 1 | 7 | 8 | 5 | 4 | 0 | 2   |
| Mean Corp      | uscul  | ar    | Volu       | me            | (fL)      | R | E | F | F | R | E | F | F | R | E | F | F | R | E | F | F   |
|                |        |       |            |               |           |   |   |   |   |   |   |   |   |   |   |   |   |   |   |   |     |
|                |        | 1     | 1          | 2             | 1         | 1 | 1 | 0 | 1 | 0 | 1 | 0 | 1 | 0 | 1 | 0 | 1 | 0 | 1 | 1 | 1   |
|                |        | 2     | 2          | 1             | 2         | 2 | 1 | 4 | 1 | 5 | 5 | 0 | 6 | 2 | 2 | 7 | 2 | 7 | 1 | 0 | 2   |
|                |        | 2     | 0          | 2             | 8         | 6 | 9 | 7 | 2 | 8 | 2 | 8 | 3 | 2 | 7 | 7 | 2 | 9 | 5 | 2 | 2   |
|                |        | 0     | 0          | 0             | 0         | 0 | 0 | 0 | 0 | 0 | 0 | 0 | 0 | 0 | 0 | 0 | 0 | 0 | 0 | 0 | 0   |
| Mean Corp      | uscul  | ar    | Hemoglobin | Concentration | (g/dL)    | R | E | F | F | R | E | F | F | R | E | F | F | R | E | F | F   |
|                |        |       |            |               |           |   |   |   |   |   |   |   |   |   |   |   |   |   |   |   |     |
|                |        | 0     | 0          | 0             | 0         | 0 | 0 | 0 | 0 | 0 | 0 | 0 | 0 | 0 | 0 | 0 | 0 | 0 | 0 | 0 | 0   |
|                |        | 2     | 4          | 4             | 5         | 0 | 3 | 7 | 2 | 7 | 2 | 0 | 7 | 9 | 5 | 5 | 4 | 0 | 3 | 2 | 2   |
|                |        | 0     | 0          | 0             | 0         | 0 | 0 | 0 | 0 | 0 | 0 | 0 | 0 | 0 | 0 | 0 | 0 | 0 | 0 | 0 | 0   |
| Red Cell       | Distri | butio | n          | Width         | Width (%) | R | E | F | F | R | E | F | F | R | E | F | F | R | E | F | F   |
|                |        |       |            |               |           |   |   |   |   |   |   |   |   |   |   |   |   |   |   |   |     |
|                |        | 0     | 0          | 0             | 0         | 0 | 0 | 0 | 0 | 0 | 0 | 0 | 0 | 0 | 0 | 0 | 0 | 0 | 0 | 0 | 0   |
|                |        | 1     | 2          | 7             | 2         | 0 | 2 | 0 | 2 | 2 | 2 | 1 | 2 | 1 | 2 | 2 | 3 | 1 | 2 | 1 | 2   |
|                |        | 0     | 3          | 3             | 4         | 9 | 3 | 6 | 2 | 4 | 7 | 1 | 8 | 6 | 4 | 7 | 3 | 8 | 2 | 8 | 2   |



|  |                                                  |   |   |   |   |   |   |   |   |   |   |   |   |   |   |   |   |   |   |   |   |
|--|--------------------------------------------------|---|---|---|---|---|---|---|---|---|---|---|---|---|---|---|---|---|---|---|---|
|  | meter                                            | c | d | c | d | c | d | c | d | c | d | c | d | c | d | c | d | c | d | c | d |
|  |                                                  | t | a | t | a | t | a | t | a | t | a | t | a | t | a | t | a | t | a | t | a |
|  |                                                  | E | r | E | r | E | r | E | r | E | r | E | r | E | r | E | r | E | r | E | r |
|  |                                                  | s | d | s | d | s | d | s | d | s | d | s | d | s | d | s | d | s | d | s | d |
|  |                                                  | t | t | t | t | t | t | t | t | t | t | t | t | t | t | t | t | t | t | t | t |
|  |                                                  | i | E | i | E | i | E | i | E | i | E | i | E | i | E | i | E | i | E | i | E |
|  |                                                  | m | r | m | r | m | r | m | r | m | r | m | r | m | r | m | r | m | r | m | r |
|  |                                                  | a | r | a | r | a | r | a | r | a | r | a | r | a | r | a | r | a | r | a | r |
|  |                                                  | t | o | t | o | t | o | t | o | t | o | t | o | t | o | t | o | t | o | t | o |
|  |                                                  | e | r | e | r | e | r | e | r | e | r | e | r | e | r | e | r | e | r | e | r |
|  | RBC                                              | 0 | 0 | 0 | 0 | 0 | 0 | 0 | 0 | 0 | 0 | 0 | 0 | 0 | 0 | 0 | 0 | 0 | 0 | 0 | 0 |
|  | (x10                                             |   |   |   |   |   |   |   |   |   |   |   |   |   |   |   |   |   |   |   |   |
|  | E6/u                                             |   |   |   |   |   |   |   |   |   |   |   |   |   |   |   |   |   |   |   |   |
|  | L)                                               |   |   |   |   |   |   |   |   |   |   |   |   |   |   |   |   |   |   |   |   |
|  |                                                  | R |   | R |   | R |   | R |   | R |   | R |   | R |   | R |   | R |   | R |   |
|  |                                                  | E | 1 | E | 2 | E | 1 | E | 2 | E | 0 | E | 1 | E | 0 | E | 1 | E | 0 | E | 0 |
|  |                                                  | F | 1 | F | 0 | F | 0 | F | 8 | F | 1 | F | 8 | F | 5 | F | 8 | F | 6 | F | 8 |
|  | Hemoglobin                                       | 0 | 0 | 1 | 0 | 0 | 0 | 1 | 0 | 0 | 0 | 0 | 0 | 0 | 0 | 1 | 0 | 0 | 0 | 0 | 0 |
|  | (g/dL)                                           |   |   |   |   |   |   |   |   |   |   |   |   |   |   |   |   |   |   |   |   |
|  |                                                  | R |   | R |   | R |   | R |   | R |   | R |   | R |   | R |   | R |   | R |   |
|  |                                                  | E | 4 | E | 5 | E | 2 | E | 2 | E | 2 | E | 6 | E | 4 | E | 2 | E | 4 | E | 2 |
|  |                                                  | F | 8 | F | 1 | F | 1 | F | 3 | F | 8 | F | 2 | F | 2 | F | 2 | F | 2 | F | 6 |
|  |                                                  |   |   |   |   |   |   |   |   |   |   |   |   |   |   |   |   |   |   |   |   |
|  |                                                  |   |   |   |   |   |   |   |   |   |   |   |   |   |   |   |   |   |   |   |   |
|  | Hematocrit (%)                                   |   |   |   |   |   |   |   |   |   |   |   |   |   |   |   |   |   |   |   |   |
|  |                                                  | R |   | R |   | R |   | R |   | R |   | R |   | R |   | R |   | R |   | R |   |
|  |                                                  | E | 1 | E | 1 | E | 5 | E | 7 | E | 7 | E | 4 | E | 4 | E | 5 | E | 0 | E | 5 |
|  |                                                  | F | 7 | F | 6 | F | 7 | F | 5 | F | 1 | F | 2 | F | 0 | F | 6 | F | 4 | F | 9 |
|  | Mean Corpuscular Volume (fL)                     | 0 | 1 | 2 | 1 | 0 | 1 | 0 | 1 | 1 | 1 | 1 | 1 | 1 | 1 | 2 | 1 | 1 | 1 | 2 | 1 |
|  |                                                  |   |   |   |   |   |   |   |   |   |   |   |   |   |   |   |   |   |   |   |   |
|  |                                                  | R |   | R |   | R |   | R |   | R |   | R |   | R |   | R |   | R |   | R |   |
|  |                                                  | E | 9 | E | 7 | E | 1 | E | 9 | E | 6 | E | 0 | E | 8 | E | 1 | E | 4 | E | 1 |
|  |                                                  | F | 3 | F | 4 | F | 4 | F | 5 | F | 8 | F | 5 | F | 6 | F | 2 | F | 6 | F | 7 |
|  | Mean Corpuscular Hemoglobin Concentration (g/dL) | 0 | 0 | 0 | 0 | 0 | 0 | 0 | 0 | 0 | 0 | 0 | 0 | 0 | 0 | 0 | 0 | 0 | 0 | 0 | 0 |
|  |                                                  |   |   |   |   |   |   |   |   |   |   |   |   |   |   |   |   |   |   |   |   |
|  |                                                  | R |   | R |   | R |   | R |   | R |   | R |   | R |   | R |   | R |   | R |   |
|  |                                                  | E | 2 | E | 3 | E | 1 | E | 5 | E | 1 | E | 2 | E | 4 | E | 1 | E | 2 | E | 1 |
|  |                                                  | F | 7 | F | 8 | F | 8 | F | 2 | F | 5 | F | 0 | F | 1 | F | 7 | F | 8 | F | 8 |
|  | Red Cell Distribution Width (%)                  | 1 | 1 | 1 | 1 | 9 | 1 | 7 | 1 | 1 | 1 | 5 | 1 | 1 | 1 | 7 | 1 | 1 | 1 | 7 | 1 |
|  |                                                  |   |   |   |   |   |   |   |   |   |   |   |   |   |   |   |   |   |   |   |   |
|  |                                                  | R |   | R |   | R |   | R |   | R |   | R |   | R |   | R |   | R |   | R |   |
|  |                                                  | E | 6 | E | 6 | E | 3 | E | 6 | E | 5 | E | 1 | E | 0 | E | 2 | E | 8 | E | 0 |
|  |                                                  | F | 6 | F | 5 | F | 8 | F | 6 | F | 6 | F | 4 | F | 5 | F | 6 | F | 9 | F | 8 |
|  | WBC                                              | 0 | 0 | 0 | 0 | 0 | 0 | 0 | 0 | 0 | 0 | 0 | 0 | 0 | 0 | 0 | 0 | 0 | 0 | 0 | 0 |

To  
ba  
cco  
S  
mo  
ke-  
Ex  
po  
se  
d

|                      |             |             |             |             |             |             |             |             |             |             |             |             |             |             |             |             |             |             |             |             |             |             |             |             |             |             |             |             |             |             |
|----------------------|-------------|-------------|-------------|-------------|-------------|-------------|-------------|-------------|-------------|-------------|-------------|-------------|-------------|-------------|-------------|-------------|-------------|-------------|-------------|-------------|-------------|-------------|-------------|-------------|-------------|-------------|-------------|-------------|-------------|-------------|
| (x10<br>E3/u<br>L)*  | E<br>F      | .<br>1      | .<br>0      | .<br>2      | .<br>0      | E<br>F      | .<br>1      | .<br>0      | .<br>2      | .<br>0      | E<br>F      | .<br>1      | .<br>0      | .<br>1      | .<br>0      | E<br>F      | .<br>1      | .<br>0      | .<br>2      | .<br>0      | E<br>F      | .<br>1      | .<br>0      | .<br>2      | .<br>0      | E<br>F      | .<br>1      | .<br>0      | .<br>1      | .<br>0      |
|                      |             | 6           | 5           | 9           | 5           |             | 5           | 5           | 9           | 5           |             | 1           | 6           | 9           | 6           |             | 3           | 5           | 0           | 5           |             | 4           | 5           | 0           | 5           |             | 0           | 5           | 1           | 5           |
| eutro<br>phils       |             | 0           | 0           | 0           | 0           |             | 0           | 0           | 0           | 0           |             | 0           | 0           | 0           | 0           |             | 0           | 0           | 0           | 0           |             | 0           | 0           | 0           | 0           |             | 0           | 0           | 0           | 0           |
| (x10<br>E3/u<br>L)*  | R<br>E<br>F | .<br>2<br>0 | .<br>0<br>7 | .<br>3<br>3 | .<br>0<br>7 | R<br>E<br>F | .<br>1<br>5 | .<br>0<br>7 | .<br>3<br>1 | .<br>0<br>7 | R<br>E<br>F | .<br>1<br>3 | .<br>0<br>8 | .<br>1<br>9 | .<br>0<br>9 | R<br>E<br>F | .<br>1<br>6 | .<br>0<br>7 | .<br>2<br>1 | .<br>0<br>7 | R<br>E<br>F | .<br>1<br>7 | .<br>0<br>7 | .<br>2<br>1 | .<br>0<br>7 | R<br>E<br>F | .<br>0<br>8 | .<br>0<br>7 | .<br>1<br>0 | .<br>0<br>8 |
| ymph<br>ocyte<br>s   |             | 0           | 0           | 0           | 0           |             | 0           | 0           | 0           | 0           |             | 0           | 0           | 0           | 0           |             | 0           | 0           | 0           | 0           |             | 0           | 0           | 0           | 0           |             | 0           | 0           | 0           | 0           |
| (x10<br>E3/u<br>L)*  | R<br>E<br>F | .<br>0<br>9 | .<br>0<br>5 | .<br>2<br>5 | .<br>0<br>5 | R<br>E<br>F | .<br>1<br>5 | .<br>0<br>5 | .<br>2<br>7 | .<br>0<br>5 | R<br>E<br>F | .<br>1<br>3 | .<br>0<br>6 | .<br>2<br>4 | .<br>0<br>6 | R<br>E<br>F | .<br>1<br>4 | .<br>0<br>5 | .<br>2<br>3 | .<br>0<br>5 | R<br>E<br>F | .<br>1<br>2 | .<br>0<br>5 | .<br>2<br>4 | .<br>0<br>5 | R<br>E<br>F | .<br>1<br>1 | .<br>0<br>6 | .<br>1<br>3 | .<br>0<br>6 |
| onoc<br>ytes         |             | 0           | 0           | 0           | 0           |             | 0           | 0           | 0           | 0           |             | 0           | 0           | 0           | 0           |             | 0           | 0           | 0           | 0           |             | 0           | 0           | 0           | 0           |             | 0           | 0           | 0           | 0           |
| (x10<br>E3/u<br>L)*  | R<br>E<br>F | .<br>0<br>6 | .<br>0<br>7 | .<br>2<br>6 | .<br>0<br>7 | R<br>E<br>F | .<br>1<br>0 | .<br>0<br>7 | .<br>2<br>8 | .<br>0<br>7 | R<br>E<br>F | .<br>0<br>9 | .<br>0<br>7 | .<br>2<br>0 | .<br>0<br>8 | R<br>E<br>F | .<br>1<br>1 | .<br>0<br>7 | .<br>2<br>2 | .<br>0<br>7 | R<br>E<br>F | .<br>1<br>5 | .<br>0<br>7 | .<br>2<br>1 | .<br>0<br>7 | R<br>E<br>F | .<br>1<br>6 | .<br>0<br>7 | .<br>1<br>9 | .<br>0<br>7 |
| osino<br>phils       |             | 0           | 0           | 0           | 0           |             | 0           | 0           | 0           | 0           |             | 0           | 0           | 0           | 0           |             | 0           | 0           | 0           | 0           |             | 0           | 0           | 0           | 0           |             | 0           | 0           | 0           | 0           |
| (x10<br>E3/u<br>L)*§ | R<br>E<br>F | .<br>2<br>0 | .<br>1<br>2 | .<br>1<br>7 | .<br>1<br>2 | R<br>E<br>F | .<br>2<br>4 | .<br>1<br>2 | .<br>2<br>8 | .<br>1<br>2 | R<br>E<br>F | .<br>1<br>4 | .<br>1<br>3 | .<br>1<br>7 | .<br>1<br>4 | R<br>E<br>F | .<br>1<br>3 | .<br>1<br>2 | .<br>1<br>6 | .<br>1<br>2 | R<br>E<br>F | .<br>1<br>4 | .<br>1<br>2 | .<br>1<br>7 | .<br>1<br>2 | R<br>E<br>F | .<br>1<br>5 | .<br>1<br>2 | .<br>1<br>1 | .<br>1<br>2 |

\*In-transformed.

All models adjusted for sex (male,female), age in years (<35,35-50,>50), race (White,Black,Other), Body Mass Index (<24.9,25.0-29.9,>30), alcohol consumption (not current drinker,fewer than 7 drinks per week,more than 7 drinks per week), education (Less than high school or equivalent,High school diploma or GED,Some college or 2 year degree,4 year college graduate), and household annual income (<\$20000,\$20001-\$50000,>\$50000).

\*Tobacco smoke-unexposed participants reported no primary tobacco use, less than 30 minutes of passive smoke exposure, and had blood 2,5-DMF concentrations less than 14 ng/L.

\*\*Tobacco smoke-exposed participants reported primary tobacco use, 30 or more minutes of passive smoke exposure, or had blood 2,5-DMF concentrations greater than or equal to 14 ng/L.

§Participants with eosinophil percentage equal to zero were assigned a value of 0.5% to permit ln-transform.
